# Supplementary material
Source: PubMed Central journal article supplement (PMC4217429)
Supplement: pnas.201414859SI.pdf [file pnas.201414859SI.pdf]

# Supporting Information

Yu et al. 10.1073/pnas.1414859111

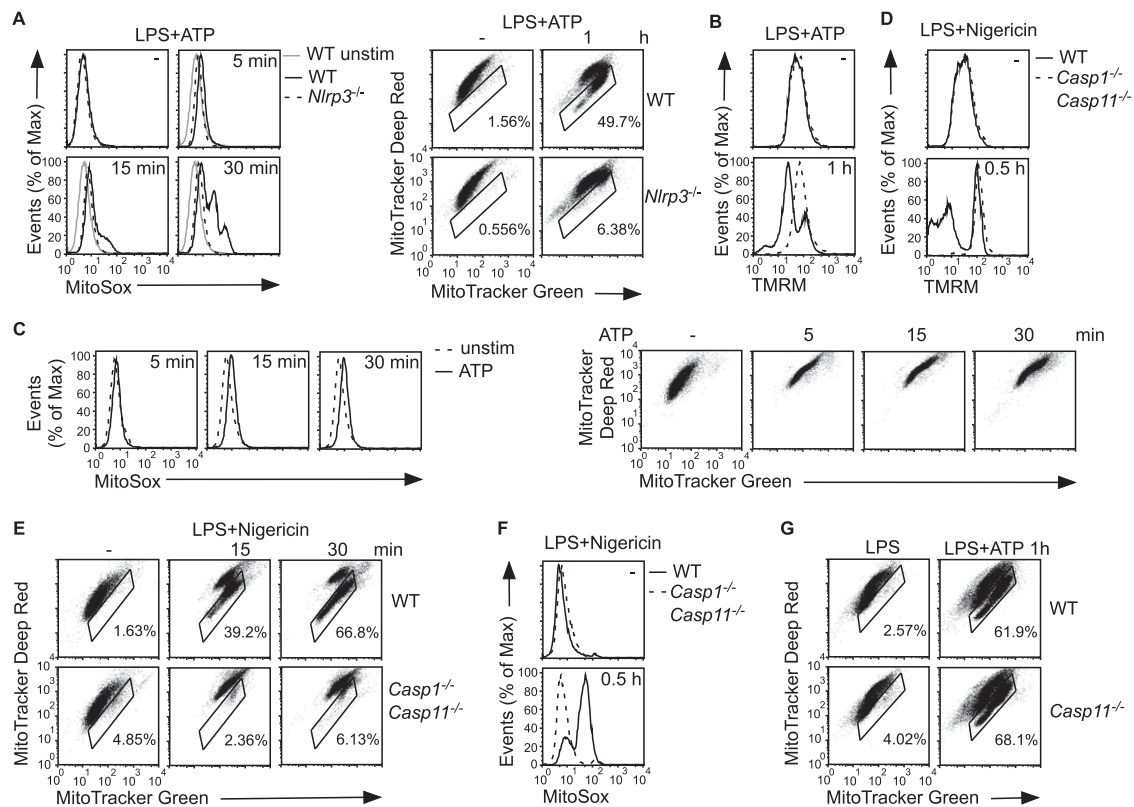

**Fig. S1.** The NLRP3 inflammasome amplifies mitochondrial damage. (A) WT and *Nlrp3*<sup>-/-</sup> BMDMs were stimulated as indicated, followed by MitoSox (Left) or Mitotracker Green and Deep Red (Right) staining. (B) WT and *Casp1*<sup>-/-</sup> *Casp11*<sup>-/-</sup> BMDMs stimulated as indicated were examined by TMRM staining. (C) WT BMDMs were stimulated with ATP followed by MitoSox (Left) or Mitotracker Green and Deep Red staining (Right). (D–F) WT and *Casp1*<sup>-/-</sup> *Casp11*<sup>-/-</sup> BMDMs were stimulated as indicated followed by TMRM (D), Mitotracker Green and Deep Red (E), and MitoSox (F) staining. (G) WT and *Casp1*<sup>-/-</sup> BMDMs stimulated as indicated were examined by Mitotracker Green and Deep Red staining.

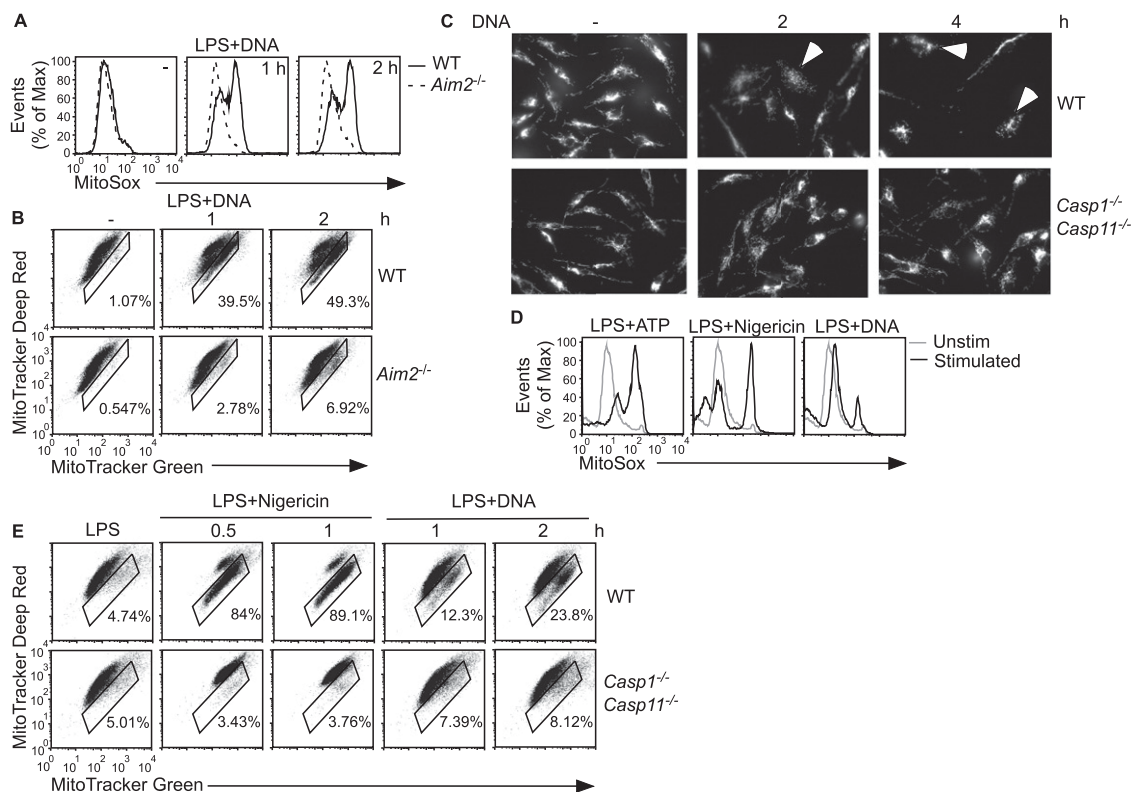

**Fig. S2.** The AIM2 inflammasome instigates mitochondrial damage. (A and B) WT and *Aim2*<sup>-/-</sup> BMDMs were stimulated as indicated followed by MitoSox (A) and Mitotracker Green and Deep Red (B) staining. (C) Mitochondrial morphology of DNA-transfected WT and *Casp1*<sup>-/-</sup>*Casp11*<sup>-/-</sup> BMDMs was examined by immunofluorescence by staining with an  $\alpha$ -Tom20 antibody. (D) Thioglycollate-elicited peritoneal macrophages were stimulated as indicated followed by MitoSox staining. (E) MCSF-generated BMDMs were stimulated as indicated followed by Mitotracker Green and Deep Red staining.

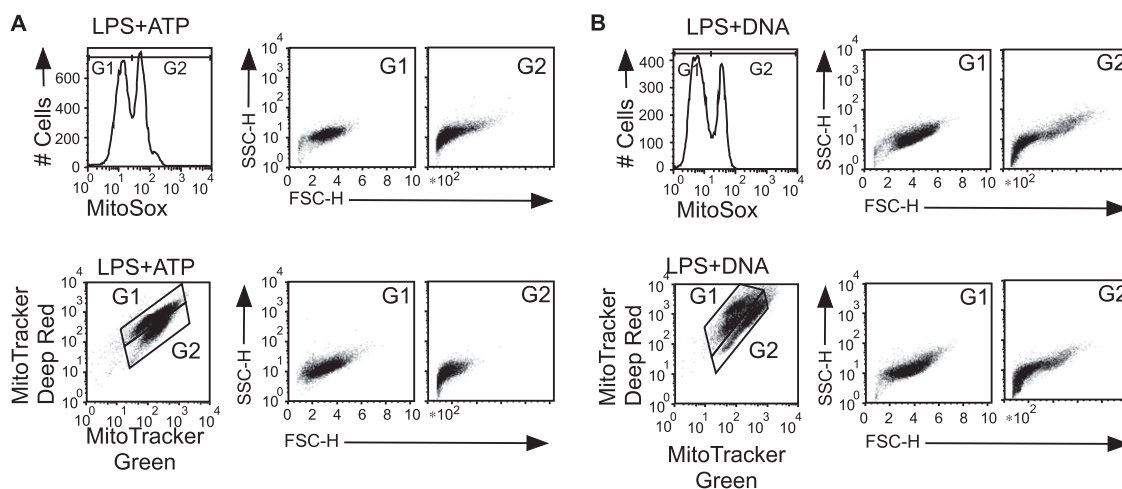

**Fig. S3.** Only cells with Caspase-1-dependent mitochondrial damage display the FSC/SSC profile of dead cells. LPS-primed BMDMs were stimulated with ATP (A) or transfected with DNA (B) followed by MitoSox staining (Upper) or Mitotracker Green and Deep Red (Lower) staining (reproduced from Figs. 1 A and B and 2 A and B). Induction of Caspase-1-dependent mitochondrial damage (see comparison of WT and *Casp1*<sup>-/-</sup>*Casp11*<sup>-/-</sup> BMDMs in Figs. 1 A and B and 2 A and B) in some (G2 gate) but not other cells (G1 gate) correlates with a low FSC/SSC profile (Right) indicative of cell death.



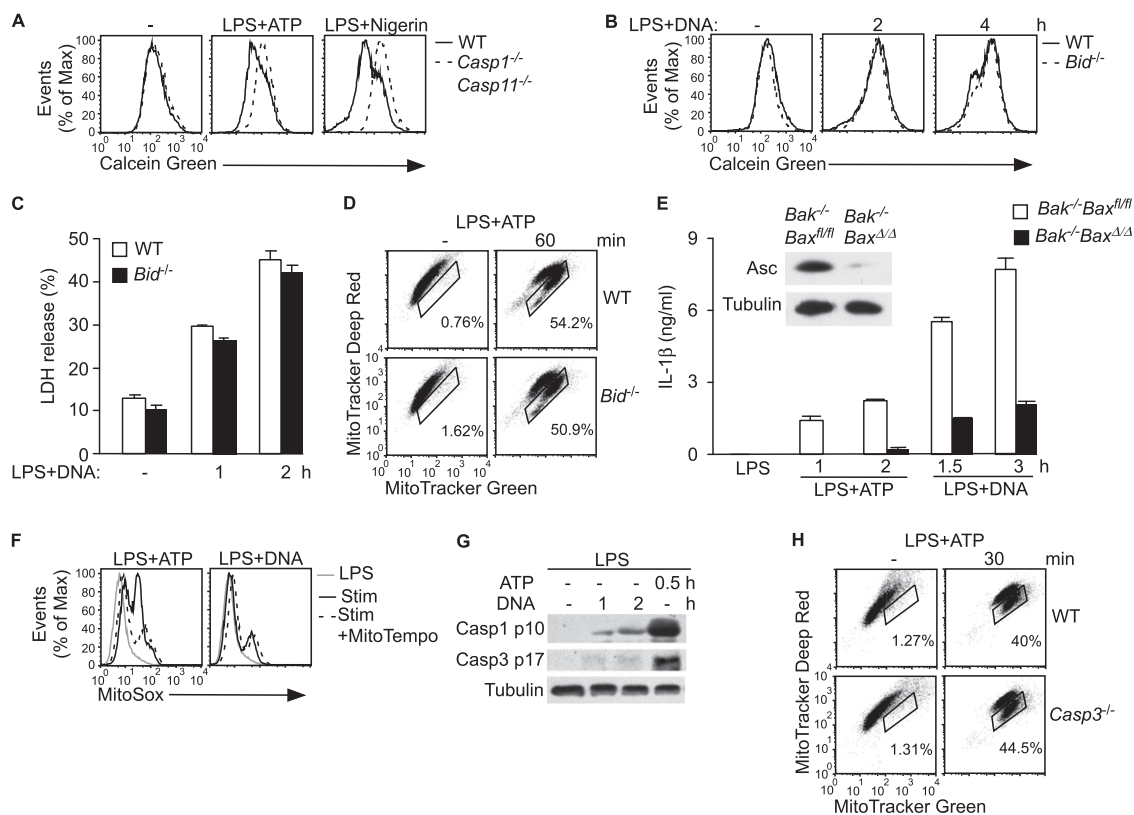

**Fig. S6.** Role of Bid in inflammasome-mediated mitochondrial damage. (A) WT and *Casp1*<sup>-/-</sup> *Casp11*<sup>-/-</sup> BMDMs were stimulated as indicated, followed by analysis in calcein green quenching assay. (B–D) WT and *Bid*<sup>-/-</sup> BMDMs were stimulated as indicated, followed by analysis in calcein green quenching (B), LDH release assay (C), and Mitotracker Green and Deep Red staining (D). (E) *Bak*<sup>-/-</sup> *Bax*<sup>fl/fl</sup> and *Bak*<sup>-/-</sup> *Bax*<sup>ΔΔ</sup> macrophage cell lines were examined by Western blotting of whole-cell lysates with α-Asc antibody (Upper) or IL-1β ELISA of culture free supernatants (Lower). (F) Analysis of MitoSox staining in WT BMDMs stimulated as indicated ± MitoTempo cotreatment. (G) WT BMDMs were stimulated as indicated followed by analysis of Caspase-1 and Caspase-3 processing to the active subunits. (H) WT and *Casp3*<sup>-/-</sup> BMDMs were stimulated as indicated and analyzed by Mitotracker Green and Deep Red staining.

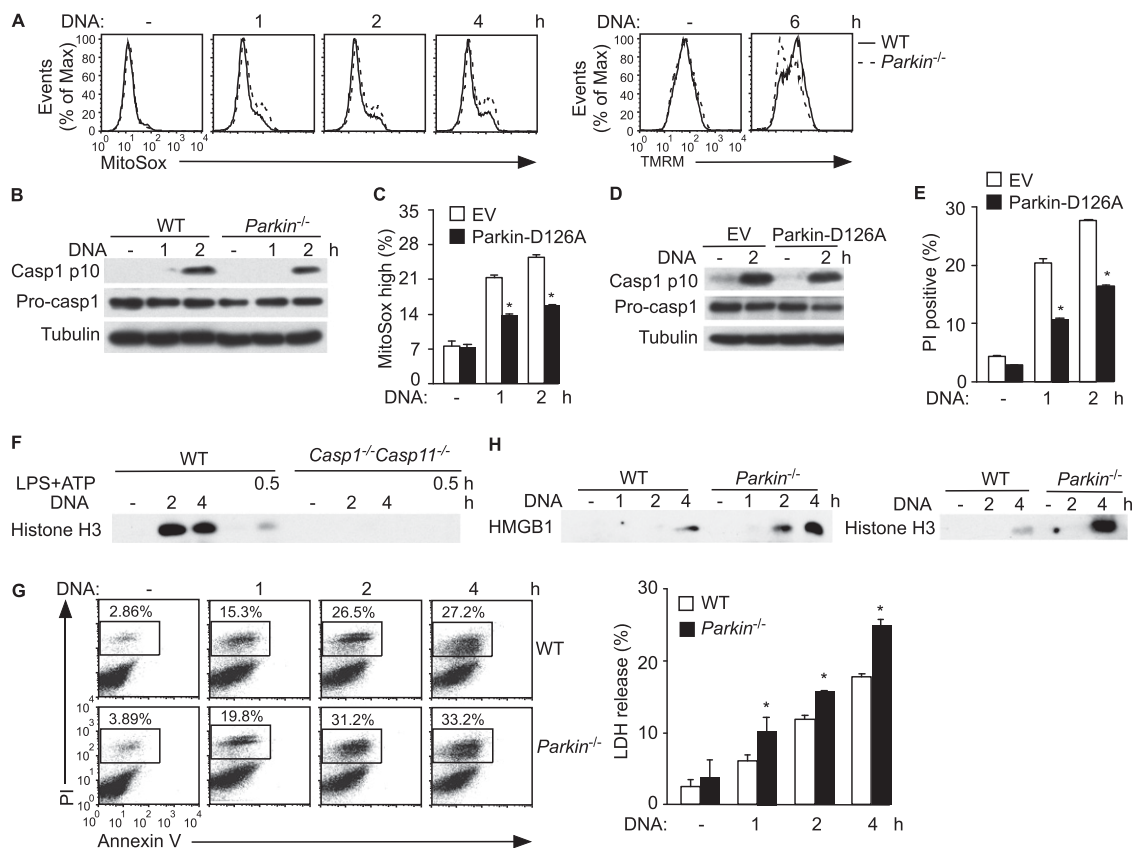

**Fig. S7.** Role of Parkin in inflammasome-mediated mitochondrial damage. (A) WT and *Parkin*<sup>-/-</sup> BMDMs were stimulated as indicated, followed by analysis by MitoSox (Left) and TMRM (Right) staining. (B) Whole-cell lysates from WT and *Parkin*<sup>-/-</sup> BMDMs were analyzed for Caspase-1 processing by Western blotting. (C) Quantitation of *n* > 3 experiments represented in Fig. 6B. \**P* < 0.05 relative to cells expressing EV. (D) Whole-cell lysates from Parkin-deficient macrophage cell lines reconstituted with empty vector (EV) or Parkin-D126A were analyzed for Caspase-1 processing by Western blotting. (E) Quantitation of *n* > 3 experiments represented in Fig. 6D. \**P* < 0.05 relative to cells expressing EV. (F) WT and *Casp1*<sup>-/-</sup>*Casp11*<sup>-/-</sup> BMDMs stimulated as indicated were analyzed for histone release by immunoblotting of cell-free culture supernatants. (G and H) WT and *Parkin*<sup>-/-</sup> BMDMs transfected with DNA were analyzed for plasmamembrane permeabilization by AV/PI staining (G, Left) and LDH release (G, Right), or for extracellular release of histone H3 and HMGB1 by immunoblotting of cell-free culture supernatants (H).

6 of 6
